# Supplementary material
Source: publisher site journal article supplement (https://www.dovepress.com/get_supplementary_file.php?f=343850.docx)
Supplement: Supplementary file 1 [file get_supplementary_file.php]

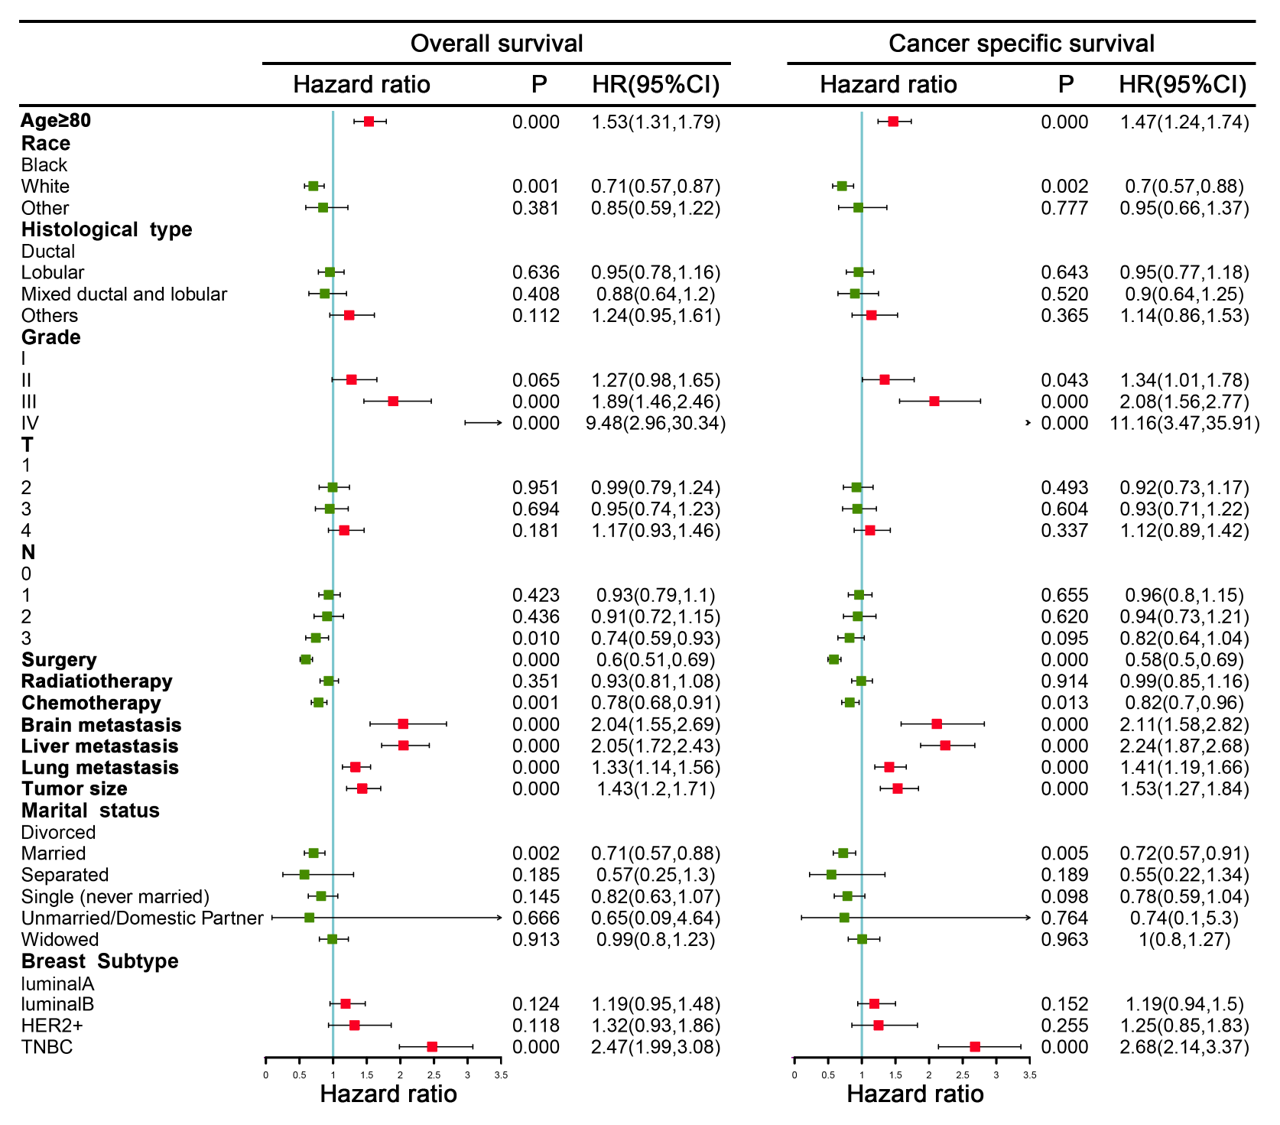


Figure S1: The forest plot showed the univariate Cox analyses of overall survival and cancer-specific survival for elderly breast cancer patients with bone metastasis. HER2: human epidermal growth factor receptor 2; TNBC: triple negative breast cancer; HR: hazard ratio


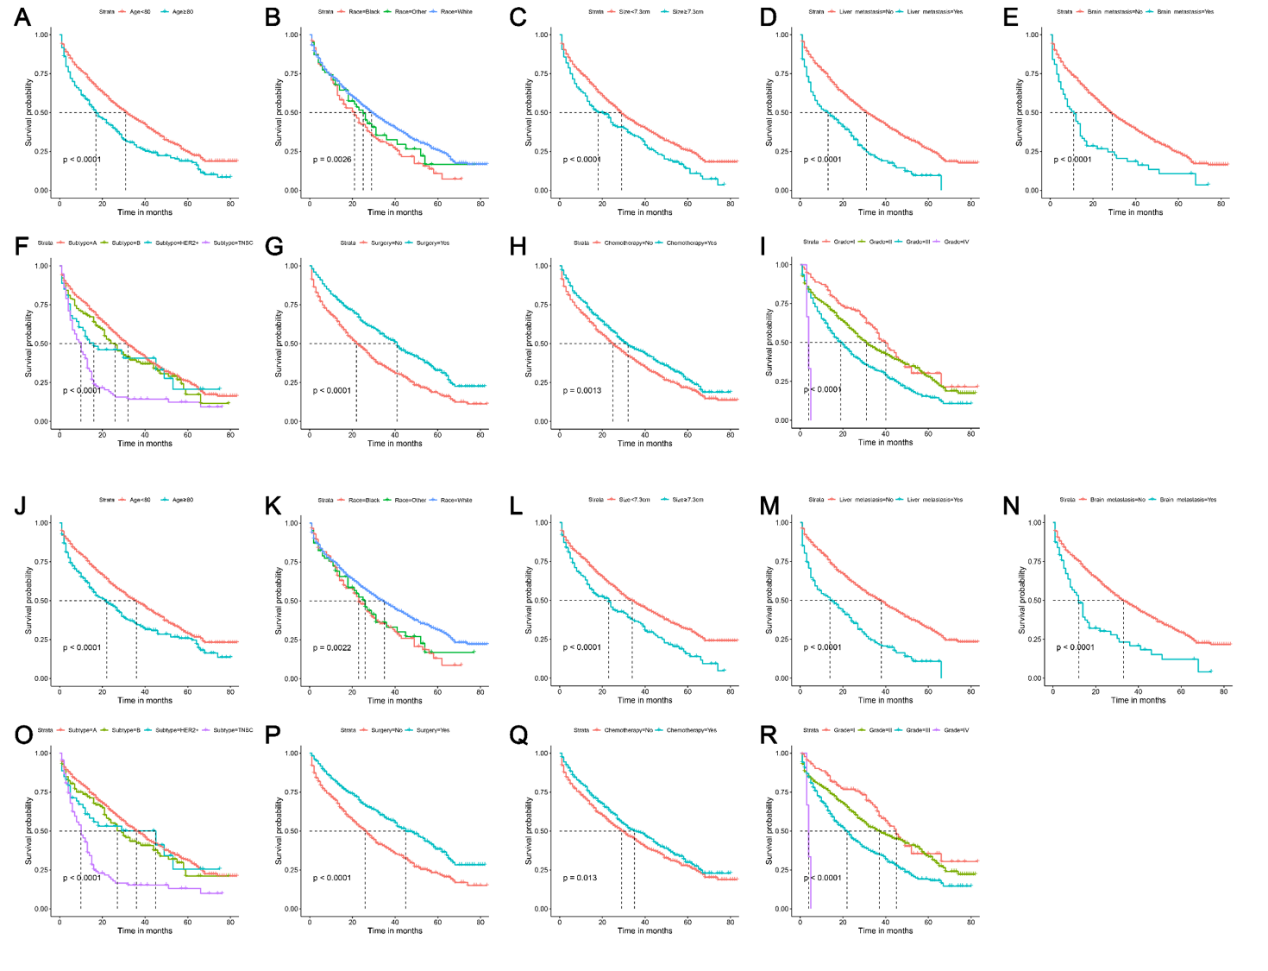


Figure S2: Survival curves showed the distinct prognosis for elderly BCBM based on different OS- or CSS-related factors. (A) Overall survival in all breast cancer patients with bone metastasis according to the different age; (B) Overall survival in all breast cancer patients with bone metastasis according to the different race; (C) Overall survival in all breast cancer patients with bone metastasis according to the different tumor size; (D) Overall survival in all breast cancer patients with bone metastasis according to the liver metastasis status; (E) Overall survival in all breast cancer patients with bone metastasis according to the brain metastasis status; (F) Overall survival in all breast cancer patients with bone metastasis according to the subtype; (G) Overall survival in all breast cancer patients with bone metastasis according to the surgery; (H) Overall survival in all breast cancer patients with bone metastasis according to the chemotherapy; (I) Overall survival in all breast cancer patients with bone metastasis according to the grade; (J) Cancer-specific survival in all breast cancer patients with bone metastasis according to the different age; (K) Cancer-specific survival in all breast cancer patients with bone metastasis according to the different race; (L) Cancer-specific survival in all breast cancer patients with bone metastasis according to the different tumor size; (M) Cancer-specific survival in all breast cancer patients with bone metastasis according to the liver metastasis status; (N) Cancer-specific survival in all breast cancer patients with bone metastasis according to the brain metastasis status; (O) Cancer-specific survival in all breast cancer patients with bone metastasis according to the subtype; (P) Cancer-specific survival in all breast cancer patients with bone metastasis according to the surgery; (Q) Cancer-specific survival in all breast cancer patients with bone metastasis according to the chemotherapy; (R) Cancer-specific survival in all breast cancer patients with bone metastasis according to the grade
